# Supplementary material for: Rapid Detection of AAV8 Binding Antibodies in Gene Therapy Candidates: Development of a Point-of-Care Approach
Source: Research Square preprint supplement (doi:10.21203/rs.3.rs-6297887/v1), 2025-04-17
Supplement: Supplementary file 1 [file 1e29955f5a2547f97d787688.xlsx]

## Sheet: MAPIA data
Table 2. Sample characterization by ELISA was performed using an AAV8 capsid at a concentration of 0.5 µg/mL, immobilized with HI16 mAb as the primary antibody. Positive samples are labeled as "POS," while negative samples are marked as "–." MAPIA-scanned lines show intensity levels for positive results as "+," and negative results are indicated by "–."
	ELISA DATA					MAPIA DATA
	Plasma Sample #	Subject ID	Primary Ab (HI16 Ab)		Interpretation	AAV8	AAV2	AAV5	AAV6	AAV9
			OD450	Calculated Conc (mg/ml)
	1	W3698 20 009127	0.916	1.2	-	-	++	-	-	-
	2	W3698 20 010750	0.194	5.2	-	-	-	-	-	-
	3	W3698 20 011008	0.289	4.26	-	-	-	-	-	-
	4	W3698 20 011030	3.067	31.69	POS	++	++	++	++	+
	5	W3698 20 009129	0.594	2.1	-	-	-	-	-	-
	6	W3698 20 011011	0.445	3	-	-	-	-	-	-
	7	W3698 20 011012	0.604	2.05	-	-	-	-	-	-
	8	W3698 20 010654	0.84	1.28	-	-	-	-	-	-
	9	W3698 20 010748	0.983	1.19	-	-	-	-	-	-
	10	W3698 20 010632	0.473	2.8	-	-	-	-	-	-
	11	W3698 20 009121	1.061	1.26	-	-	++	+	+	-
	12	W3698 20 010746	1.585	3.88	-	-	++	-	-	-
	13	W3698 20 010638	0.848	1.27	-	-	+	-	+	-
	14	W3698 20 010648	0.271	4.43	-	-	-	-	-	-
	15	W3698 20 010678	0.338	3.83	-	-	-	-	-	-
	16	W3698 20 010647	3.2	35.66	POS	++	++	-	+	+
	17	W3698 20 009116	2.96	28.67	POS	++	++	++	++	+
	18	W3698 20 010688	0.431	3.1	-	-	-	-	-	-
	19	W3698 20 010659	0.74	1.52	-	-	-	-	-	-
	20	W3698 20 010646	0.241	4.72	-	-	-	-	-	-
