# Supplementary material for: Rapid Detection of AAV8 Binding Antibodies in Gene Therapy Candidates: Development of a Point-of-Care Approach
Source: Research Square preprint supplement (doi:10.21203/rs.3.rs-6297887/v1), 2025-04-17
Supplement: Supplementary file 2 [file 44be690d72d9e4e70b42eb75.xlsx]

## Sheet: Sheet1
		Table 4. Correlation between DPP AAV8 TAb Assay, AAV8 TAb ELISA, and AAV8 NAb ELISA assays
				AAV8 NAb ELISA
				Positive	Negative
		Cell-based NAb Assay	Positive	7	0
			Negative	1	6
				DPP AAV8 TAb Assay
				Positive	Negative
		Cell-based NAb Assay	Positive	7	0
			Negative	0	7
