# Supplementary material for: Rapid Detection of AAV8 Binding Antibodies in Gene Therapy Candidates: Development of a Point-of-Care Approach
Source: Research Square preprint supplement (doi:10.21203/rs.3.rs-6297887/v1), 2025-04-17
Supplement: Supplementary file 3 [file b172ac5a4f2b537806d87ada.xlsx]

## Sheet: Sheet1
Table 3. Performance metrics of DPP-AAV8 Assay
			Anti-AAV8 Antibody Standard
			Mouse Monoclonal Antibody, Clone HI16	Human Polyclonal Antibody
		Dynamic Range (µg/mL)	0-50	0-32
		LOB (µg/mL)	2.5	0.7
		LOD (µg/mL)	2.5	1.5
		Assay Precision (%CV)	<11	<10
