# Supplementary material for: Rapid Detection of AAV8 Binding Antibodies in Gene Therapy Candidates: Development of a Point-of-Care Approach
Source: Research Square preprint supplement (doi:10.21203/rs.3.rs-6297887/v1), 2025-04-17
Supplement: Supplementary file 4 [file d05573ed9bbccd716ad6b60b.xlsx]

## Sheet: Sheet1
Table 1. List of AAV8 TAb ELISA cut-off concentration/value
		Cut-off Definition	Cut-off Value (µg/ml)
		Negative average + 2 x standard deviation	6.09
		Negative average + 3 x standard deviation	8.04
		Negative average + 4 x standard deviation	10.01
		Negative average + 5 x standard deviation	12.02
